# **Pre-existing T cell-mediated cross-reactivity to SARS-CoV-2 cannot solely be explained by prior exposure to endemic human coronaviruses**

Cedric C.S. Tan<sup>1\*</sup>, Christopher J. Owen<sup>1</sup>, Christine Y.L. Tham<sup>2</sup>, Antonio Bertoletti<sup>2</sup>, Lucy van Dorp<sup>1&</sup>, Francois Balloux<sup>1&</sup>

<sup>1</sup> UCL Genetics Institute, University College London, Gower Street, London, WC1E 6BT, United Kingdom

<sup>2</sup> Emerging Infectious Diseases Program, Duke-NUS Medical School, 8 College Road, Singapore, 169857, Singapore

\* Corresponding Author

E-mail: cedricstan@gmail.com

& Co-last authors.

## 14 **Abstract (205 words)**

15 Several studies have reported the presence of pre-existing humoral or cell-mediated cross-reactivity to  
 16 SARS-CoV-2 peptides in healthy individuals unexposed to SARS-CoV-2. In particular, the current  
 17 literature suggests that this pre-existing cross-reactivity could, in part, derive from prior exposure to  
 18 ‘common cold’ endemic human coronaviruses (HCoV). In this study, we characterised the sequence  
 19 homology of SARS-CoV-2-derived T-cell epitopes reported in the literature across the entire diversity of  
 20 the *Coronaviridae* family. Slightly over half (54.8%) of the tested epitopes did not have noticeable  
 21 homology to any of the human endemic coronaviruses (HKU1, OC43, NL63 and 229E), suggesting prior  
 22 exposure to these viruses cannot explain the full cross-reactive profiles observed in healthy unexposed  
 23 individuals. Further, we find that the proportion of cross-reactive SARS-CoV-2 epitopes with noticeable  
 24 sequence homology is extremely well predicted by the phylogenetic distance to SARS-CoV-2 ( $R^2 =$   
 25 96.6%). None of the coronaviruses sequenced to date showed a statistically significant excess of T-cell  
 26 epitope homology relative to the proportion of expected random matches given the sequence similarity of  
 27 their core genome to SARS-CoV-2. Taken together, our results suggest that the repertoire of cross-reactive  
 28 epitopes reported in healthy adults cannot be primarily explained by prior exposure to any coronavirus  
 29 known to date, or any related yet-uncharacterised coronavirus.

## 30 Introduction

31 Severe acute respiratory coronavirus 2 (SARS-CoV-2) is a member of a large family of viruses; the  
 32 *Coronaviridae*, whose members can infect a wide range of mammals and birds (1). Human coronaviruses  
 33 were first described in the 1960s (2) with SARS-CoV-2 now the seventh coronavirus known to infect  
 34 humans; joining the epidemic human coronaviruses SARS-CoV-1 (3) and MERS-CoV (4) and the four  
 35 species of endemic human coronaviruses (HCoV). Human endemic coronaviruses are associated with  
 36 mostly mild upper respiratory infections – ‘common colds’ – and include *Coronaviridae* of the  
 37 *Alphacoronavirus* genera 229E and NL63 and members of the *Betacoronavirus* genera OC43 and HKU1  
 38 (5) to which MERS-CoV, SARS-CoV-1 and SARS-CoV-2 also belong. Both SARS-CoV-1 and SARS-  
 39 CoV-2 fall into a subgenus of the *Betacoronavirus* named the *Sarbecovirus* (6), with approximately 80%  
 40 identity at the nucleotide level between SARS-CoV-1 and SARS-CoV-2. All human coronaviruses are  
 41 thought to be zoonotic in origin, though the exact animal reservoirs remain under debate in some cases  
 42 (7).

43 SARS-CoV-2 is estimated to have jumped from a currently unknown animal reservoir into the human  
 44 population towards the end of 2019 (8) giving rise to the pandemic disease Coronavirus disease 2019  
 45 (COVID-19). The symptoms associated with COVID-19 range from fully asymptomatic infections and  
 46 mild disease through to severe respiratory disease with associated morbidity and mortality. Marked  
 47 disparities exist in individual risk of severe COVID-19 with gender, ethnicity, metabolic health and age  
 48 all identified as important determinants (9–11). At a between country level, population age structures and  
 49 heterogeneous burdens in nursing homes explain some but not all of the variation in infection fatality rates  
 50 (IFRs) between countries (12). Further important contributors may include climatic variables (e.g.  
 51 temperature and humidity) and associated seasonal correlates (13–15), the choice of non-pharmaceutical  
 52 interventions put in place, though with a myriad of other possibly unknown contributing factors.

53 In light of the wide spectrum of symptoms associated to COVID-19, several studies have probed antibody  
 54 (16–18) or T-cell responses (19–28) in samples from healthy individuals collected prior to the COVID-19  
 55 pandemic to test for the presence of pre-existing cross-reactivity to SARS-CoV-2. Collectively, these  
 56 findings provide evidence for a degree of T-cell cross-reactivity in unexposed individuals in multiple  
 57 regions of the world. While the source of this cross-reactivity is still not well-defined, at least some of the  
 58 cross-reactive T-cell epitopes are suggested to derive from exposure to the four endemic human  
 59 coronaviruses (19,22), which are circulating in most parts of the world prior to the COVID-19 pandemic

(5), typically in seasonal cycles (29). The relative contribution of each of the four HCoV to T-cell cross-reactivity patterns observed in unexposed individuals remains unclear. Notably, Peng et al. (25) did not find the presence of cross-reactivity in a cohort of 16 unexposed donors. As such, current evidence suggests that prior exposure to HCoVs may play only a modest role in T-cell cross-reactivity to SARS-CoV-2 in unexposed people.

To date, it also remains unclear whether the detected cross-immunity in unexposed individuals translates into differential COVID-19 pathogenesis. The evidence for a mitigating role of recent HCoV infection on COVID-19 susceptibility and symptom severity upon infection remains conflicting (30,31), and HCoV-reactive T-cells in unexposed individuals have been shown to have only low functional avidity (27). Nonetheless there has been speculation that cross-immunity with the ‘common cold’ endemic HCoVs may, in part, explain variation in the COVID-19 case-fatality rate in different parts of the world (32,33) and that the high incidence of common colds in children and adolescents has contributed to their markedly lower risk of severe disease (18). Additionally, the possible unnoticed circulation in the human population of another animal-associated coronavirus, at least in some regions of the world, cannot at this stage be formally ruled out to have contributed to regional heterogeneities in the spread and associated mortality of COVID-19.

In this study, we employed a bioinformatics approach to probe the possible sources of pre-existing T-cell immunity in samples from healthy individuals predating the COVID-19 pandemic. We analysed sequence conservation over the SARS-CoV-2 proteome across the *Coronaviridae*, which involved the construction of a core gene family-wide phylogeny of all coronavirus representatives that have been sequenced to date. We subsequently assessed the homology to endemic HCoVs and other members of the *Coronaviridae* of 177 CD4<sup>+</sup> and CD8<sup>+</sup> epitopes identified in healthy unexposed individuals reported by four independent studies. We find that more than half of the reported epitopes (54.8%) did not have detectable homology to any of the endemic HCoVs. Additionally, none of the sequenced members of the *Coronaviridae* could explain a higher proportion of reported epitopes than expected by chance, given the phylogenetic similarity of their core genome to SARS-CoV-2. Our results suggest that prior exposure to coronaviruses does not primarily explain cross-reactivity patterns to SARS-CoV-2 in unexposed individuals. Instead, patterns of pre-existing T-cell cross-reactivity to SARS-CoV-2 seem in line with lifelong exposure to a diverse and heterogenous array of primarily microbial antigens. We anticipate that our findings will facilitate further characterisations of the potential sources of pre-existing T-cell immunity.

## Results

### Conservation analysis across the family-wide phylogeny of *Coronaviridae*

To reconstruct the genomic diversity of the entire *Coronaviridae* family, we extracted a concatenated alignment of core (shared) genes (ORF1ab, S, M, N) from genome assemblies of 2531 coronaviruses and constructed a Maximum Likelihood phylogeny (**Fig 1a, Table S1**). We then decomposed the SARS-CoV-2 proteome (NC\_045512.2) into 15-mer peptide sequences overlapping by 14 amino acids and performed protein BLAST searches to determine the homology to protein sequences translated from each of the 2531 coronavirus assemblies isolated from a range of hosts. The proteome-wide homology of 15-mer peptides across the *Coronaviridae* is represented in **Fig. 1b**. At a 40% sequence identity cut-off, SARS-CoV-2 peptide sequences were highly conserved across the family near the C-terminal end of the ORF1ab polyprotein. Representations of alternative homology thresholds (66% and 80%) provide qualitatively similar patterns (**Fig. S1a** and **Fig. S1b**). This region of homology includes the RNA-dependent RNA polymerase (RdRp) (nsp12) and helicase (nsp13) which are known regions of high conservation across the coronaviruses, with the former frequently used as a taxonomic marker (34).

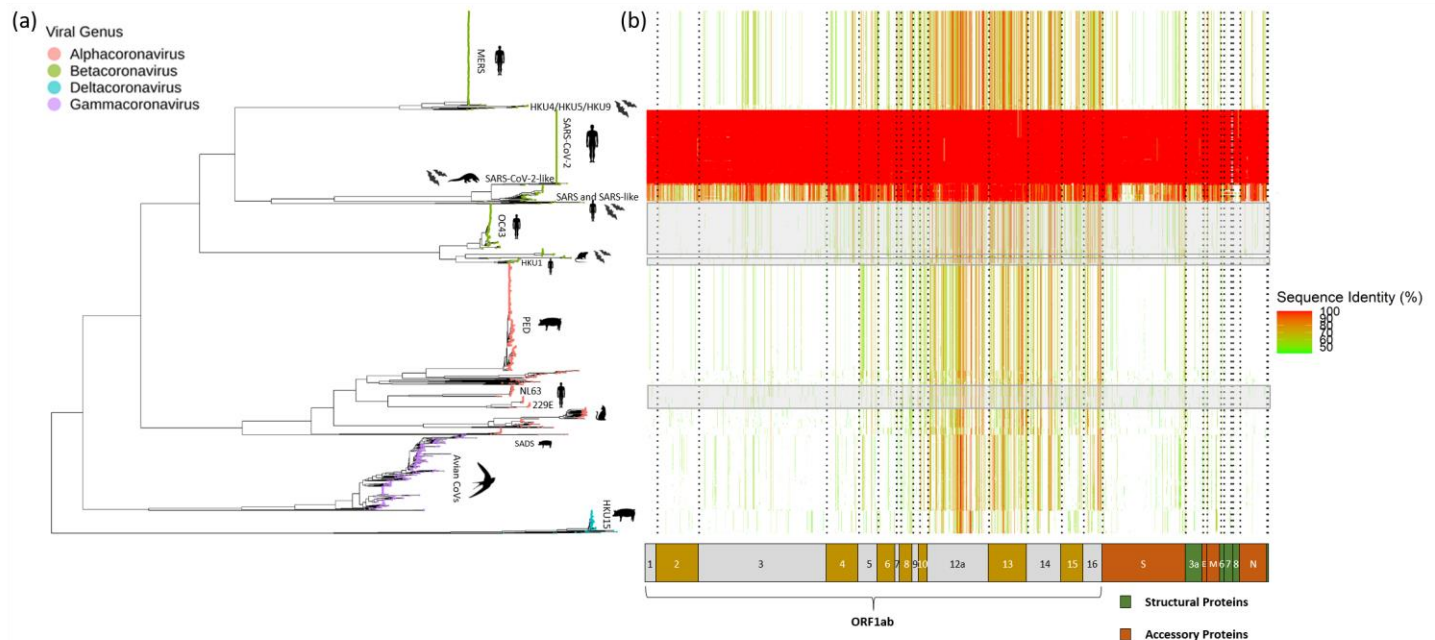

**Figure 1. Conservation analysis of SARS-CoV-2-derived 15-mer peptides across the *Coronaviridae*.** (a) Maximum likelihood phylogeny of a concatenated alignment of core genes in the *Coronaviridae* annotated by viral genera (tip colour) and highlighting major hosts (**Table S1**). (b) Heatmap visualising the homology of SARS-CoV-2-derived 15-mer peptide sequences across the family. Each row and column correspond to a tip on the phylogeny and a single 15-mer peptide, respectively. The fill of each cell provides the level of homology of a particular SARS-CoV-2-derived 15-mer peptide to the proteome of a single genome record as given by the colour scale at right. Grey boxes highlight the rows of the heatmap corresponding to each of the four endemic human coronaviruses. The homology threshold set to report a protein BLAST hit was 40%.

## Cross-reactivity profiles cannot be completely explained by exposure to endemic HCoVs

We analysed the sequence homology of 177 cross-reactive peptides found to elicit T-cell response in published work on four independent cohorts of healthy unexposed people from Singapore (22), the USA (19) and Germany (23,26) to endemic HCoV protein sequences (**Figure 2**). Notably, we found that 76.3-83.1% of the epitopes could not be explained by homology to any of the four endemic HCoV species individually. In addition, 97 of the 177 epitopes (54.8%) did not have any detectable homology to all the four endemic HCoVs combined (henceforth ‘unexplained’ epitopes). To investigate the potential source of ‘unexplained’ epitopes within the *Coronaviridae* further, we calculated the proportion of these 97 ‘unexplained’ epitopes with detectable homology to each remaining virus in our dataset individually (excluding SARS-CoV-2) (**Figure S2**). The results suggest that a large proportion of ‘unexplained’





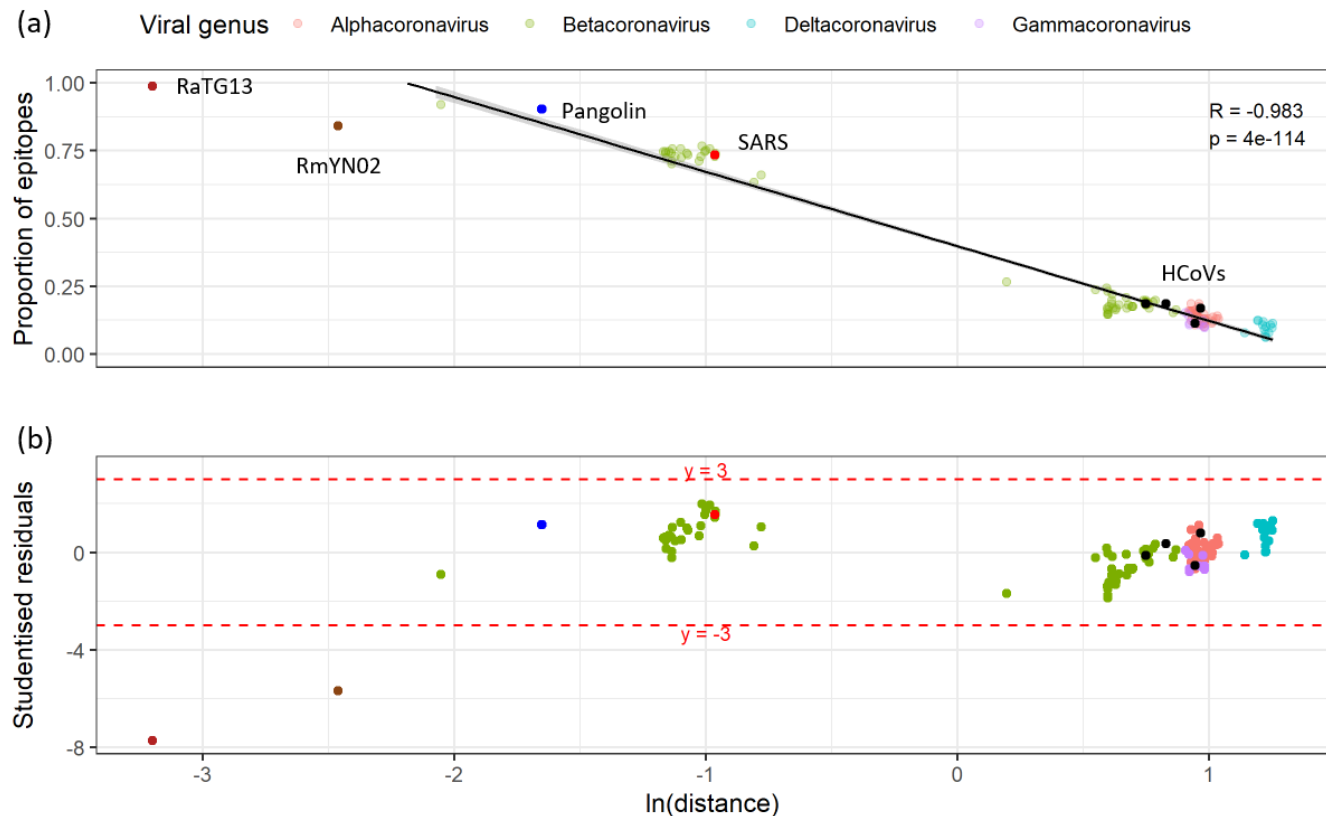

**Figure 3. Relationship between the proportion of unexposed epitopes that have detectable sequence homology and the cophenetic distance to SARS-CoV-2 in a representative subset of the *Coronaviridae*.** (a) Scatter plot and least squares regression line providing the proportion of epitopes with detectable homology to a coronavirus species (y-axis) and the natural logarithm of cophenetic distance to SARS-CoV-2 (x-axis). The dataset was filtered to only include 155 viruses encompassing all unique host and viral species combinations and are coloured by viral genera, with key members highlighted (**Table S2b**). Pearson's correlation coefficient and its associated  $p$ -value of the two variables were calculated using the *cor.test* function in *R*. (b) Scatter plot of studentised residuals calculated using the function *studres* from the *MASS* package (35) in *R*.

### Possible sources for T-cell cross-reactivity beyond coronaviruses

To identify possible sources for the T-cell cross-reactivity observed in people unexposed to SARS-CoV-2, we also performed a protein BLAST search for all 177 experimentally validated epitopes against the NCBI non-redundant protein database (excluding the taxon *Coronaviridae*), storing the first 1000 hits in each case. A fraction of the epitopes (10/177) share partial homology with proteins from a very diverse range of taxa, including viruses, bacteria and unicellular eukaryotes (**Table S3**). However, the lowest Expect (E) value of the protein BLAST hits, which represents the number of similar hits expected by chance given the size of the database used and the length of the query (36), is 7.5. This suggests that all



170 the hits shown in **Table S3** could be explained by chance alone. Together with the wide diversity of taxa  
171 identified, the results suggest that there is no single candidate for the source(s) of the T-cell cross-reactive  
172 repertoire beyond the *Coronaviridae*.

## Discussion

SARS-CoV-2 cross-reactive T-cells in healthy unexposed individuals have been identified as potentially important contributors to the immunological response to COVID-19. Prior exposure to globally circulating endemic coronaviruses present some of the strongest candidates for eliciting such cross-immunity. Though, the relative contribution of these coronaviruses to the reactive T-cell epitopes identified in multiple cohorts of healthy individuals have been only partially explored. We characterised the amino acid homology of SARS-CoV-2-derived T-cell epitopes reported in COVID-19 unexposed individuals from Singapore (22), the USA (19) and Germany (23,26) against the entire proteome of the *Coronaviridae* family, including all major mammalian and avian lineages.

Following a comprehensive screen, we found that 54.8% of reported T-cell epitopes did not have any detectable homology to the four human endemic coronavirus species (HKU1, OC43, NL63 and 229E) (**Figure 2**), despite HCoV infections circulating widely in global human populations (5). We note that the highest conservation to confirmed T-cell epitopes tended to be within members of the *Sarbecovirus* subgroup, which includes SARS-CoV-1, SARS-CoV-2, and a few related species that have been isolated mostly from bats and pangolins but are not known to have been in widespread circulation in humans. However, this homology can be well explained by the phylogenetic affinity of these viral species to SARS-CoV-2 (**Figure 3**). In addition, we note that the region of high sequence homology across all coronaviruses (nsp12-nsp16) (**Figure 1**) is not a primary immune target in COVID-19 convalescent patients (CD8<sup>+</sup> T-cells). Furthermore, SARS-CoV-2 infection leads to a heterogenous pattern of cell-mediated immune responses over the entire SARS-CoV-2 genome, largely falling outside of the spike protein, not enriched in the terminal end of ORF1ab largely conserved among the coronaviruses, and does not consistently lead to cross-reactivity with endemic HCoVs (37).

Our work adds to a growing suite of evidence that prior HCoV infections are not the sole, and possibly not even the main, candidates responsible for cross-reactive T-cell epitopes in SARS-CoV-2 unexposed individuals. We argue that previous studies that presented empirical evidence of T-cell cross-reactivity with HCoV-derived peptides did not take into account the genetic relatedness of endemic HCoVs to SARS-CoV-2, placing an over-emphasis on these viruses as the source of pre-existing T-cell immunity. This opens the question as to what other antigens may have primed the intrinsic cross-reactivity identified (38) in pre-pandemic samples. A sizeable fraction of cross-reactive T-cell epitopes remains unexplained by prior exposure to any known coronavirus in circulation. It feels fairly implausible that the ‘unexplained’

cross-reactive epitopes are due to prior exposure to a yet undescribed coronavirus. Indeed, such a hypothetical yet-to-be described coronavirus would have needed to be in circulation globally until very recently and then vanished, which seems highly unlikely. Additionally, since we incorporated the whole known genetic diversity of coronaviruses in our analyses, which has been extensively sampled, such an unknown pathogen would have to be phylogenetically unrelated to any coronavirus characterised to date. As such, an unknown coronavirus would be an unlikely candidate for as a source of this ‘unexplained’ T-cell cross-reactivity.

Possible alternative agents for the unexplained cross-reactive epitopes may include widespread microbes, or widely administrated vaccines. The tuberculosis bacille Calmette-Guerin (BCG) vaccines have been suggested as candidates providing some cross-immunity against SARS-CoV-2 (39,40). However, our screen of all 177 published T-cell epitopes found no homology to any *Mycobacterium* species (**Table S3**). As such, BCG vaccination represents a most unlikely contributor to the T-cell cross-reactivity observed. Instead we identify a diverse spread of putative antigens with low detectable homology. The presence of such a broad pre-existing repertoire of CD4<sup>+</sup> reactive T-cells in healthy adults has previously been observed in the context of cross-reactivity to HIV and influenza infection, and interpreted as the result of prior exposure to environmental antigens (41) or proteins in the human microbiome (38). It has also been postulated that the cross-reactive profile may take on an increasing role with age and immunological experience (42) which may result in high levels of inter-individual variation based on infection history and HLA type.

Admittedly, sequence homology is an indirect proxy for probing the source of T-cell cross-reactivity. Yin and Mariuzza (43) reviewed five putative mechanisms of T-cell cross-reactivity, all of which highlight the complex and diverse molecular interactions of peptide, major histocompatibility complex (MHC) and T-cell receptors. In particular, molecular mimicry would suggest that conservation of structure can compensate for lower sequence homology (44–46). At the same time, higher sequence homology improves the likelihood that structural or chemical characteristics are conserved. Deconvolving the relationship between sequence homology and cross-reactivity is evidently non-trivial and remains a limitation of our work. Indeed, we do not rule out the possibility that peptides of lower homology from members of the *Coronaviridae* can result in cross-reactivity. However, we note that the sequence homology analysis of HCoV and SARS-CoV-2 epitopes by Mateus et al. (19) suggests a positive

association of sequence homology and the frequency of cross-reactivity, providing an empirical basis for our approach.

Our results highlight the importance of considering the wider phylogenetic context of circulating antigens contributing to immunological memory to novel pathogens. The widespread and repeated exposure of global human populations to circulating endemic HCoV is expected to have left an immunological legacy which might modulate COVID-19 pathogenesis. However, our results suggest that the extensive observed T-cell cross-reactivity is unlikely to have been caused by prior exposure to any known coronavirus in global circulation. It is nonetheless clear that the potential cross-reactive repertoire is widespread and present in cohorts of healthy people from multiple countries around the globe (19–28), even if perhaps at low avidity (27). It remains to be established to what extent such cross-reactivity translates into immunity to SARS-CoV-2, both in terms of susceptibility to infection and symptom severity upon infection.

## 243 **Methods**

### 244 **Data acquisition**

245 3300 publicly available complete *Coronaviridae* assemblies were downloaded from NCBI Virus using  
 246 the *taxid*: 1118 together with accompanying metadata on 08/04/2020. Additionally, we downloaded 12  
 247 bat and pangolin Coronavirus sequences from GISAID (47) (acknowledgements in **Table S4**). Sequence  
 248 duplicates were identified and removed from the combined dataset using *seqkit rmdup* (48) together with  
 249 those with >10% of sites set to N. Accessions were later retained in the dataset only for those with a  
 250 reported host of isolation. This resulted in a final dataset of 2533 assemblies with complete metadata with  
 251 the latter manually cleaned to ensure consistent reporting of host and viral species.

### 252 **Maximum Likelihood phylogeny of Coronaviridae**

253 To reconstruct the genomic diversity of the entire *Coronaviridae* family, we extracted the shared core  
 254 genes from the representative genome assemblies across all genera. First, open reading frames (ORFs)  
 255 were identified using the genome annotation tool *Prokka* v1.14.6 (49). Next, the *Roary* pipeline v3.11.12  
 256 (50) was used to cluster all *Coronaviridae* ORFs at a minimum amino-acid homology threshold of 30%.  
 257 Sequences for the four genes ORF1ab, S, M and N were each found to cluster in a minimum of 2531  
 258 assemblies, which were then extracted, concatenated and aligned using *MAFFT* v7.453 (51). The resulting  
 259 alignment was trimmed of gaps found in 20% or more isolates and used to build a Maximum Likelihood  
 260 phylogeny using *RAxML* v8.2.12 (52) with 1000 bootstraps for node support. We provide the curated  
 261 metadata of the final 2531 viral records used in our analysis in **Table S1**.

262 As it was not possible to include an outgroup in the *Coronaviridae* concatenated-core alignment, an  
 263 alignment-free analysis was used to identify the most basal genus with which to root the family Maximum  
 264 Likelihood phylogeny. All *RefSeq* genome assemblies belonging to the virus order *Nidovirales* were  
 265 downloaded, which contained 103 sequences accross the sub-orders *Arnidovirineae*, *Cornidovirineae*,  
 266 *Mesnidovirineae*, *Nanidovirineae*, *Ronidovirineae* and *Tornidovirineae*. Each assembly contained a  
 267 ORF1ab CDS annotated ORF, the only gene shared by all members of the *Nidovirales* (53), which were  
 268 decomposed into 11-mer sequences using *MASH* v2.1.1 (54). Based on pairwise Jaccard Distances of  
 269 matched 11-mers between all ORF1ab sequences, a Neighbour-Joining tree was constructed to assess the  
 270 genetic relationship between members of the *Nidovirales*. The genus *Deltacoronavirus* was identified to

be the most basal clade of the *Coronaviridae* in the wider context of the taxonomic order and was therefore used to force-root the family Maximum Likelihood phylogeny.

## Sequence conservation analysis

We decomposed the SARS-CoV-2 proteome (sequences retrieved from *RefSeq*; NC\_045512.2) into 9394 15-mer peptides overlapping by 14 amino acids using a custom *R* script ([https://github.com/cednotsed/tcell\\_cross\\_reactivity\\_covid/blob/main/utis/make\\_fasta\\_out\\_of\\_proteins.R](https://github.com/cednotsed/tcell_cross_reactivity_covid/blob/main/utis/make_fasta_out_of_proteins.R)). In addition, we retrieved the sequences of 177 epitopes found to elicit a response in at least one individual from Singapore (22), the USA (19) and Germany (23,26) from published supplementary tables. The breakdown of the number of epitopes for each T-cell response type is shown in **Table S5b**. Translated protein sequences of all ORFs from each of the 2531 assemblies were retrieved from *Prokka* (49) and used to construct a protein BLAST database. Separately, a protein BLAST database was also constructed from the protein annotations associated with the 2531 assemblies, which were downloaded using *NCBI Batch Entrez* (<https://www.ncbi.nlm.nih.gov/sites/batchentrez>). Subsequently, we used *blastp* from *BLAST+* v2.11.0 (55) to determine the sequence similarity of the 15-mer peptides from the SARS-CoV-2 proteome and the 177 published epitopes using the two databases and. The resultant protein BLAST outputs were merged by retaining only the hit with the maximum percentage identity for each assembly and query combination. To maximise the number alignments obtained we set *-num\_alignments* and *-evalue* parameters to  $10^9$  and  $2 \times 10^9$ , respectively. In addition, to optimise the protein BLAST search for short sequences, *-task* was set to *blastp-short*. Lastly, only alignments involving the full length of the query sequence were considered by setting *-qcov\_hsp\_perc* as 99. This threshold was employed because the query sequences are short and so sequence identity would only be a meaningful measure of homology in alignments given the whole sequence.

## Proportion of published epitopes and cophenetic distance

Using the merged output of the protein BLAST search querying the 177 published epitopes, we analysed the proportion of epitopes that had detectable homology to each virus in a representative filtered dataset of all combinations of unique host and virus species ( $n = 155$ ). The cophenetic distance of each virus relative to SARS-CoV-2 was calculated using *cophenetic.phylo* from the *ape* package v5.3 (56) in *R* from the Maximum Likelihood *tree* file. A least squares regression of the proportion of epitopes with detectable homology on the natural logarithm of cophenetic distance was performed using the *lm* function in *R*.

Pearson's correlation of the two variables was calculated using the *cor.test* function in R. The studentised residuals were calculated using the *studres* function as part of the *MASS* package v7.3-53 (35).

### **Non-Coronaviridae protein BLAST**

To determine if any proteome outside of the *Coronaviridae* had detectable homology to any of the 177 epitopes reported in the literature, we performed a protein BLAST using the online *blastp suite* (<https://tinyurl.com/y22o4t9z>) against the non-redundant protein sequence database (accessed 7/12/2020), while excluding sequences associated with the *Coronaviridae* (taxid: 11118). Protein BLAST searches were conducted in eight batches of 20 and a ninth batch of 17 epitopes with the number of alignments performed set to 1000 per batch. After merging the outputs of the eight batches, we filtered the resultant table to exclude missing organism names, hits with descriptions containing the terms 'synthetic', 'SARS', 'coronavirus', or 'cov', or organism names labelled as 'uncultured bacterium'. Additionally, we excluded hits to the accession 6ZGH\_A, which contains a region of the SARS-CoV-2 spike protein sequence.

### **Data and code availability**

All source code used for the analyses can be found on GitHub ([https://github.com/cednotsed/tcell\\_cross\\_reactivity\\_covid.git](https://github.com/cednotsed/tcell_cross_reactivity_covid.git)). Genomic data for the *Coronaviridae* were obtained from publicly available accessions on NCBI Virus. The 12 further bat and pangolin associated coronaviruses were also included from the GISAID repository, with full acknowledgements provided in **Table S4**. The list of epitopes used and the frequency table of CD4<sup>+</sup> and CD8<sup>+</sup> T-cell epitopes stratified by study cohort can be found in **Table S5a** and **Table S5b** respectively.

### **Competing Interests**

The authors have no competing interests to declare.

### **Acknowledgements and Funding**

L.v.D and F.B. acknowledge financial support from the Newton Fund UK-China NSFC initiative (grant MR/P007597/1) and the BBSRC (equipment grant BB/R01356X/1). L.v.D. is supported by a UCL Excellence Fellowship. C.O. is funded by a NERC-DTP studentship. Finally, we acknowledge the large number of research groups openly sharing SARS-CoV-2 genomic and immunological data with the research community.



# References

1. Shaw LP, Wang AD, Dylus D, Meier M, Pogacnik G, Dessimoz C, et al. The phylogenetic range of bacterial and viral pathogens of vertebrates. *Mol Ecol* [Internet]. 2020 May 10;n/a(n/a). Available from: <https://doi.org/10.1111/mec.15463>
2. Tyrrell DAJ, Bynoe ML. Cultivation of a novel type of common-cold virus in organ cultures. *Br Med J*. 1965;1(5448):1467.
3. Ksiazek TG, Erdman D, Goldsmith CS, Zaki SR, Peret T, Emery S, et al. A novel coronavirus associated with severe acute respiratory syndrome. *N Engl J Med*. 2003;348(20):1953–66.
4. Zaki AM, Van Boheemen S, Bestebroer TM, Osterhaus ADME, Fouchier RAM. Isolation of a novel coronavirus from a man with pneumonia in Saudi Arabia. *N Engl J Med*. 2012;367(19):1814–20.
5. Su S, Wong G, Shi W, Liu J, Lai ACK, Zhou J, et al. Epidemiology, genetic recombination, and pathogenesis of coronaviruses. *Trends Microbiol*. 2016;24(6):490–502.
6. Boni MF, Lemey P, Jiang X, Lam TT-Y, Perry B, Castoe T, et al. Evolutionary origins of the SARS-CoV-2 sarbecovirus lineage responsible for the COVID-19 pandemic. *bioRxiv*. 2020;
7. Ye Z-W, Yuan S, Yuen K-S, Fung S-Y, Chan C-P, Jin D-Y. Zoonotic origins of human coronaviruses. *Int J Biol Sci*. 2020;16(10):1686.
8. van Dorp L, Acman M, Richard D, Shaw LP, Ford CE, Ormond L, et al. Emergence of genomic diversity and recurrent mutations in SARS-CoV-2. *Infect Genet Evol* [Internet]. 2020;104351. Available from: <http://www.sciencedirect.com/science/article/pii/S1567134820301829>
9. Jordan RE, Adab P, Cheng KK. Covid-19: risk factors for severe disease and death. *British Medical Journal Publishing Group*; 2020.
10. Wu C, Chen X, Cai Y, Zhou X, Xu S, Huang H, et al. Risk factors associated with acute respiratory distress syndrome and death in patients with coronavirus disease 2019 pneumonia in Wuhan, China. *JAMA Intern Med*. 2020;
11. Zhou F, Yu T, Du R, Fan G, Liu Y, Liu Z, et al. Clinical course and risk factors for mortality of adult

- inpatients with COVID-19 in Wuhan, China: a retrospective cohort study. *Lancet*. 2020;
12. O'Driscoll M, Dos Santos GR, Wang L, Cummings DAT, Azman AS, Paireau J, et al. Age-specific mortality and immunity patterns of SARS-CoV-2. *Nature*. 2020;1–9.
13. Walker AS, Pritchard E, House T, Robotham J V, Birrell PJ, Bell I, et al. Viral load in community SARS-CoV-2 cases varies widely and temporally. *medRxiv* [Internet]. 2020 Jan 1;2020.10.25.20219048. Available from: <http://medrxiv.org/content/early/2020/10/27/2020.10.25.20219048.abstract>
14. Gaunt ER, Hardie A, Claas ECJ, Simmonds P, Templeton KE. Epidemiology and Clinical Presentations of the Four Human Coronaviruses 229E, HKU1, NL63, and OC43 Detected over 3 Years Using a Novel Multiplex Real-Time PCR Method. *J Clin Microbiol* [Internet]. 2010 Aug 1;48(8):2940 LP – 2947. Available from: <http://jcm.asm.org/content/48/8/2940.abstract>
15. Moriyama M, Hugentobler WJ, Iwasaki A. Seasonality of Respiratory Viral Infections. *Annu Rev Virol* [Internet]. 2020 Sep 29;7(1):83–101. Available from: <https://doi.org/10.1146/annurev-virology-012420-022445>
16. Lv H, Wu NC, Tsang OT-Y, Yuan M, Perera RAPM, Leung WS, et al. Cross-reactive Antibody Response between SARS-CoV-2 and SARS-CoV Infections. *Cell Rep* [Internet]. 2020;31(9):107725. Available from: <http://www.sciencedirect.com/science/article/pii/S2211124720307026>
17. Ladner JT, Henson SN, Boyle AS, Engelbrektson AL, Fink ZW, Rahee F, et al. Epitope-resolved profiling of the SARS-CoV-2 antibody response identifies cross-reactivity with an endemic human CoV. *bioRxiv Prepr Serv Biol* [Internet]. 2020 Jul 27;2020.07.27.222943. Available from: <https://pubmed.ncbi.nlm.nih.gov/32743570>
18. Ng KW, Faulkner N, Cornish GH, Rosa A, Harvey R, Hussain S, et al. Preexisting and de novo humoral immunity to SARS-CoV-2 in humans. *Science* (80- ) [Internet]. 2020 Nov 6;eabe1107. Available from: <http://science.sciencemag.org/content/early/2020/11/05/science.abe1107.abstract>
19. Mateus J, Grifoni A, Tarke A, Sidney J, Ramirez SI, Dan JM, et al. Selective and cross-reactive SARS-CoV-2 T cell epitopes in unexposed humans. *Science* (80- ). 2020;370(6512):89–94.
20. Grifoni A, Weiskopf D, Ramirez SI, Mateus J, Dan JM, Moderbacher CR, et al. Targets of T cell responses

- to SARS-CoV-2 coronavirus in humans with COVID-19 disease and unexposed individuals. *Cell*. 2020;
21. Weiskopf D, Schmitz KS, Raadsen MP, Grifoni A, Okba NMA, Endeman H, et al. Phenotype of SARS-CoV-2-specific T-cells in COVID-19 patients with acute respiratory distress syndrome. *medRxiv*. 2020;
22. Le Bert N, Tan AT, Kunasegaran K, Tham CYL, Hafezi M, Chia A, et al. SARS-CoV-2-specific T cell immunity in cases of COVID-19 and SARS, and uninfected controls. *Nature*. 2020;584(7821):457–62.
23. Nelde A, Bilich T, Heitmann JS, Maringer Y, Salih HR, Roerden M, et al. SARS-CoV-2-derived peptides define heterologous and COVID-19-induced T cell recognition. *Nat Immunol*. 2020;1–12.
24. Braun J, Loyal L, Frentsch M, Wendisch D, Georg P, Kurth F, et al. SARS-CoV-2-reactive T cells in healthy donors and patients with COVID-19. *Nature*. 2020;1–5.
25. Peng Y, Mentzer AJ, Liu G, Yao X, Yin Z, Dong D, et al. Broad and strong memory CD4+ and CD8+ T cells induced by SARS-CoV-2 in UK convalescent individuals following COVID-19. *Nat Immunol* [Internet]. 2020;21(11):1336–45. Available from: <https://doi.org/10.1038/s41590-020-0782-6>
26. Schulien I, Kemming J, Oberhardt V, Wild K, Seidel LM, Killmer S, et al. Characterization of pre-existing and induced SARS-CoV-2-specific CD8+ T cells. *Nat Med*. 2020;1–8.
27. Bacher P, Rosati E, Esser D, Martini GR, Saggau C, Schiminsky E, et al. Low avidity CD4+ T cell responses to SARS-CoV-2 in unexposed individuals and humans with severe COVID-19. *Immunity* [Internet]. 2020; Available from: <http://www.sciencedirect.com/science/article/pii/S1074761320305033>
28. Sekine T, Perez-Potti A, Rivera-Ballesteros O, Strålin K, Gorin J-B, Olsson A, et al. Robust T Cell Immunity in Convalescent Individuals with Asymptomatic or Mild COVID-19. *Cell* [Internet]. 2020;183(1):158-168.e14. Available from: <http://www.sciencedirect.com/science/article/pii/S0092867420310084>
29. Neher RA, Dyrda R, Druelle V, Hodcroft EB, Albert J. Potential impact of seasonal forcing on a SARS-CoV-2 pandemic. *Swiss Med Wkly*. 2020;150(1112).
30. Sagar M, Reifler K, Rossi M, Miller NS, Sinha P, White L, et al. Recent endemic coronavirus infection is associated with less severe COVID-19. *J Clin Invest* [Internet]. 2020 Sep 30; Available from: <https://doi.org/10.1172/JCI143380>
31. Gombor S, Bergquist T, Pejaver V, Hammarlund N, Murugesan K, Mooney S, et al. SARS-CoV-2 infection

and COVID-19 severity in individuals with prior seasonal coronavirus infection. medRxiv [Internet]. 2020 Jan 1;2020.12.04.20243741. Available from: <http://medrxiv.org/content/early/2020/12/07/2020.12.04.20243741.abstract>

32. Gupta R, Misra A. COVID19 in South Asians/Asian Indians: Heterogeneity of data and implications for pathophysiology and research. Diabetes Res Clin Pract [Internet]. 2020;165:108267. Available from: <http://www.sciencedirect.com/science/article/pii/S0168822720305179>

33. Yaqinuddin A. Cross-immunity between respiratory coronaviruses may limit COVID-19 fatalities. Med Hypotheses [Internet]. 2020 Jun 30;144:110049. Available from: <https://pubmed.ncbi.nlm.nih.gov/32758887>

34. Latinne A, Hu B, Olival KJ, Zhu G, Zhang L, Li H, et al. Origin and cross-species transmission of bat coronaviruses in China. Nat Commun [Internet]. 2020;11(1):4235. Available from: <https://doi.org/10.1038/s41467-020-17687-3>

35. Ripley B, Venables B, Bates DM, Hornik K, Gebhardt A, Firth D, et al. Package ‘mass.’ Cran R. 2013;538.

36. Tatusova TA, Madden TL. BLAST 2 Sequences, a new tool for comparing protein and nucleotide sequences. FEMS Microbiol Lett. 1999;174(2):247–50.

37. Ferretti AP, Kula T, Wang Y, Nguyen DM V, Weinheimer A, Dunlap GS, et al. Unbiased Screens Show CD8<sup>+</sup> T Cells of COVID-19 Patients Recognize Shared Epitopes in SARS-CoV-2 that Largely Reside outside the Spike Protein. Immunity [Internet]. 2020;53(5):1095-1107.e3. Available from: <http://www.sciencedirect.com/science/article/pii/S1074761320304477>

38. Champion SL, Brodie TM, Fischer W, Korber BT, Rossetti A, Goonetilleke N, et al. Proteome-wide analysis of HIV-specific naive and memory CD4(+) T cells in unexposed blood donors. J Exp Med [Internet]. 2014/06/23. 2014 Jun 30;211(7):1273–80. Available from: <https://pubmed.ncbi.nlm.nih.gov/24958850>

39. Tomita Y, Sato R, Ikeda T, Sakagami T. BCG vaccine may generate cross-reactive T cells against SARS-CoV-2: In silico analyses and a hypothesis. Vaccine [Internet]. 2020;38(41):6352–6. Available from: <http://www.sciencedirect.com/science/article/pii/S0264410X20310860>

40. Escobar LE, Molina-Cruz A, Barillas-Mury C. BCG vaccine protection from severe coronavirus disease

2019 (COVID-19). *Proc Natl Acad Sci* [Internet]. 2020 Jul 28;117(30):17720 LP – 17726. Available from: <http://www.pnas.org/content/117/30/17720.abstract>

41. Su LF, Kidd BA, Han A, Kotzin JJ, Davis MM. Virus-specific CD4(+) memory-phenotype T cells are abundant in unexposed adults. *Immunity* [Internet]. 2013/02/07. 2013 Feb 21;38(2):373–83. Available from: <https://pubmed.ncbi.nlm.nih.gov/23395677>
42. Woodland DL, Blackman MA. Immunity and age: living in the past? *Trends Immunol*. 2006;27(7):303–7.
43. Yin Y, Mariuzza RA. The Multiple Mechanisms of T Cell Receptor Cross-reactivity. *Immunity* [Internet]. 2009;31(6):849–51. Available from: <http://www.sciencedirect.com/science/article/pii/S1074761309005135>
44. Macdonald WA, Chen Z, Gras S, Archbold JK, Tynan FE, Clements CS, et al. T cell allorecognition via molecular mimicry. *Immunity*. 2009;31(6):897–908.
45. Wucherpfennig KW, Strominger JL. Molecular mimicry in T cell-mediated autoimmunity: viral peptides activate human T cell clones specific for myelin basic protein. *Cell*. 1995;80(5):695–705.
46. Quarantino S, Thorpe CJ, Travers PJ, Londei M. Similar antigenic surfaces, rather than sequence homology, dictate T-cell epitope molecular mimicry. *Proc Natl Acad Sci*. 1995;92(22):10398–402.
47. Elbe S, Buckland-Merrett G. Data, disease and diplomacy: GISAID’s innovative contribution to global health. *Glob Challenges*. 2017;1(1):33–46.
48. Shen W, Le S, Li Y, Hu F. SeqKit: A Cross-Platform and Ultrafast Toolkit for FASTA/Q File Manipulation. *PLoS One* [Internet]. 2016 Oct 5;11(10):e0163962. Available from: <https://doi.org/10.1371/journal.pone.0163962>
49. Seemann T. Prokka: rapid prokaryotic genome annotation. *Bioinformatics*. 2014;30(14):2068–9.
50. Page AJ, Cummins CA, Hunt M, Wong VK, Reuter S, Holden MTG, et al. Roary: rapid large-scale prokaryote pan genome analysis. *Bioinformatics*. 2015;31(22):3691–3.
51. Katoh K, Misawa K, Kuma K, Miyata T. MAFFT: a novel method for rapid multiple sequence alignment based on fast Fourier transform. *Nucleic Acids Res*. 2002;30(14):3059–66.
52. Stamatakis A. RAXML version 8: a tool for phylogenetic analysis and post-analysis of large phylogenies. *Bioinformatics*. 2014;30(9):1312–3.

53. Lauber C, Goeman JJ, del Carmen Parquet M, Nga PT, Snijder EJ, Morita K, et al. The footprint of genome architecture in the largest genome expansion in RNA viruses. *PLoS Pathog.* 2013;9(7):e1003500.
54. Ondov BD, Treangen TJ, Melsted P, Mallonee AB, Bergman NH, Koren S, et al. Mash: fast genome and metagenome distance estimation using MinHash. *Genome Biol.* 2016;17(1):132.
55. Camacho C, Coulouris G, Avagyan V, Ma N, Papadopoulos J, Bealer K, et al. BLAST+: architecture and applications. *BMC Bioinformatics.* 2009;10(1):421.
56. Paradis E, Schliep K. ape 5.0: an environment for modern phylogenetics and evolutionary analyses in R. *Bioinformatics.* 2019;35(3):526–8.
57. Allen M, Poggiali D, Whitaker K, Marshall TR, Kievit RA. Raincloud plots: a multi-platform tool for robust data visualization. *Wellcome open Res.* 2019;4.

Supplementary Material

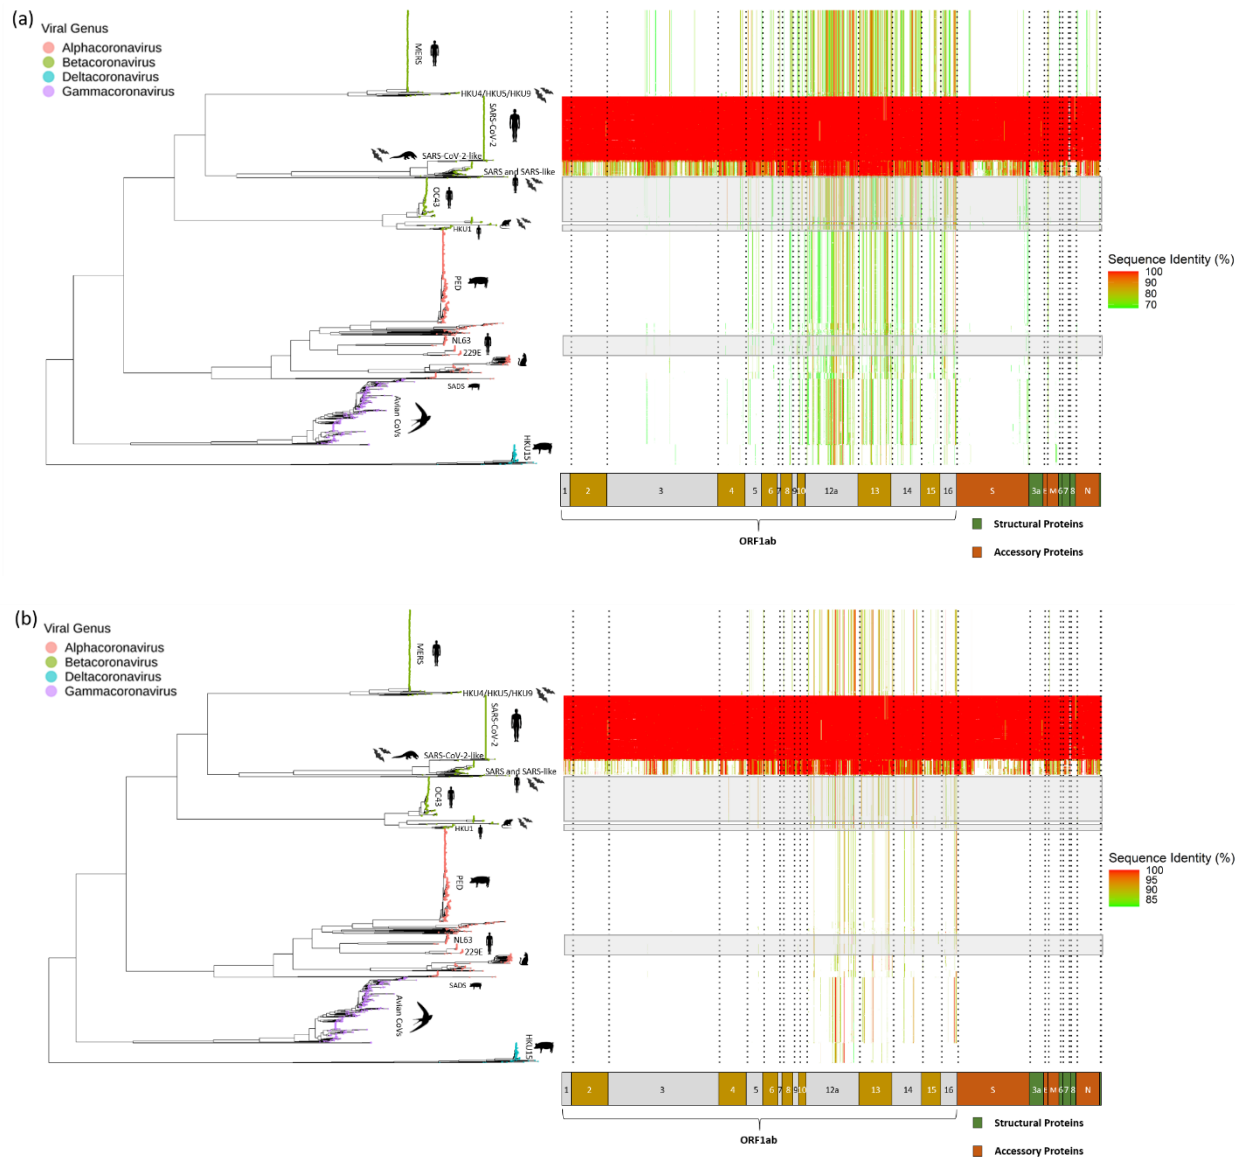

**Figure S1. Conservation analysis of SARS-CoV-2-derived 15-mer peptides across the *Coronaviridae*.** Maximum likelihood phylogeny and heatmap visualising the homology of SARS-CoV-2-derived 15-mer peptide sequences across the family, similar to that shown in **Figure 1** but using (a) 66% and (b) 80% as the protein BLAST homology threshold.



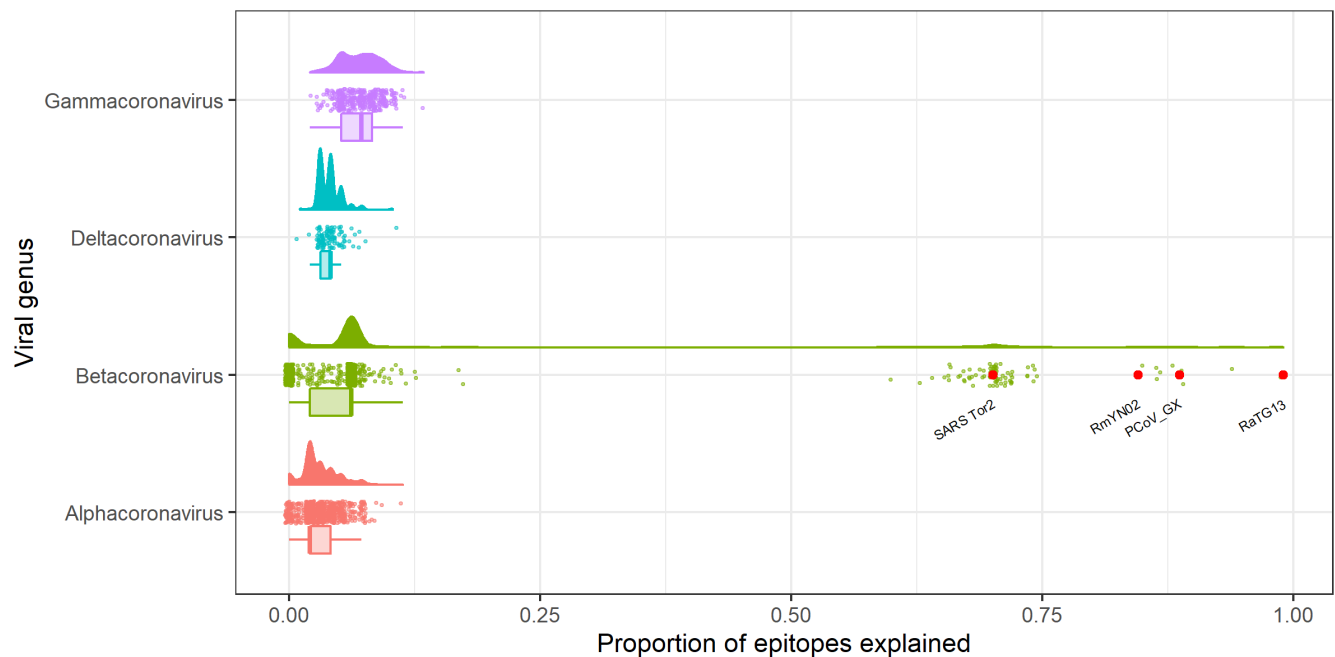

**Figure S2. Proportion of ‘unexplained’ epitopes that have detectable sequence homology to members of Coronaviridae.** Raincloud plot (57) of the proportion of ‘unexplained’ epitopes that have detectable homology to each coronavirus in our dataset (excluding SARS-CoV-2).

**Table S1. Curated metadata of the 2531 viral records in the *Coronaviridae*.**

**Table S2. Proportion of epitopes with detectable homology to proteins of the *Coronaviridae*.** (a) Proportion of 97 ‘unexplained’ epitopes explained by each of the viruses in our dataset (excluding HCoV and SARS-CoV-2). (b) Proportion of all 177 published epitopes for 155 viruses with unique host and viral species (excluding SARS-CoV-2). These tables were generated using a custom R script ([github.com/cednotsed/tcell\\_cross\\_reactivity\\_covid/blob/main/plot\\_deconvoluted\\_hcov\\_heatmap.R](https://github.com/cednotsed/tcell_cross_reactivity_covid/blob/main/plot_deconvoluted_hcov_heatmap.R)).

**Table S3. Protein BLAST results of 177 published epitopes against non-*Coronaviridae* proteins.** Merged protein BLAST output of eight searches (<https://tinyurl.com/y22o4t9z>). Merging was performed using a custom R script ([github.com/cednotsed/tcell\\_cross\\_reactivity\\_covid/blob/main/utis/merge\\_web\\_blast.R](https://github.com/cednotsed/tcell_cross_reactivity_covid/blob/main/utis/merge_web_blast.R)).

**Table S4. GISAID acknowledgements table for the 12 bat and pangolin coronavirus sequences.**

**Table S5.** (a) List of 177 epitopes used in this study, including their respective study source and T-cell response type. (b) Frequency table generated from **Table S5a** stratified by study name and T-cell response type.
